# Supplementary material for: Efficient Adsorption-Assisted Photocatalysis Degradation of Congo Red through Loading ZIF-8 on KI-Doped TiO2
Source: MDPI journal article supplement (doi:10.3390/ma15082857), 2022-04-13
Supplement: s1 [file s1]

## Supporting Information

### **Efficient Adsorption-assisted Photocatalysis Degradation of Congo red through loading ZIF-8 on KI-doped TiO<sub>2</sub>**

**Zhechen Liu<sup>1,†</sup>; Wanqi Zhang<sup>1,†</sup>; Xilong Zhao<sup>1,†</sup>; Xianliang Sheng<sup>2</sup>; Zichu Hu<sup>2</sup>; Qiang Wang<sup>2</sup>; Zhangjing Chen<sup>3</sup>; Sunguo Wang<sup>4</sup>; Xiaotao Zhang<sup>2,5,\*</sup>; Ximing Wang<sup>1,5,\*</sup>**

<sup>1</sup> College of Material Science and Art Design, Inner Mongolia Agricultural University, Hohhot, 010018, China.

<sup>2</sup> College of Science, Inner Mongolia Agricultural University, Hohhot, 010018, China.

<sup>3</sup> Department of Sustainable Biomaterials, Virginia Polytechnic Institute and State University, Blacksburg, VA, 24060, USA.

<sup>4</sup> Sungro Bioresource & Bioenergy Technologies Corp, Alberta, T6R3J6, Canada.

<sup>5</sup> Inner Mongolia Key Laboratory of Sandy Shrubs Fibrosis and Energy Development and Utilization, Hohhot, 010018, China.

\* Correspondence should be addressed to Xiaotao Zhang and Ximing Wang.

E-mail: lianzixiaotao@163.com; wangximing@imau.edu.cn.

† Contributed equally to this paper.

### 1. Wavelength scanning curve of Congo red

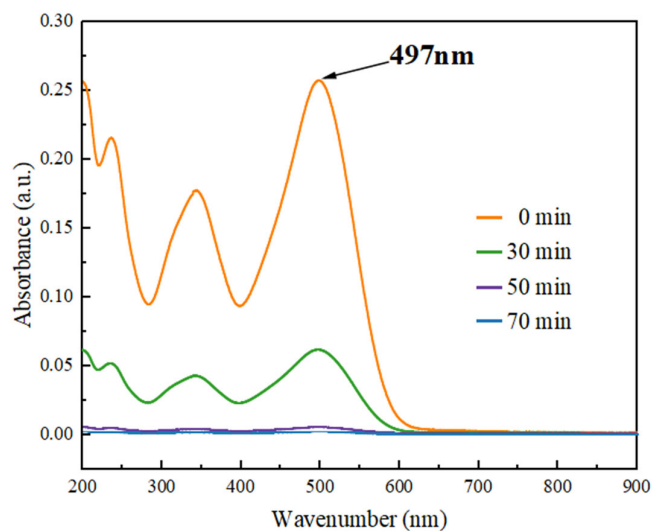

Figure. S1. Wavelength scanning curve of Congo red.

### 2. Recycling efficiency of ZIF-8@TiO<sub>2</sub> (5%KI)

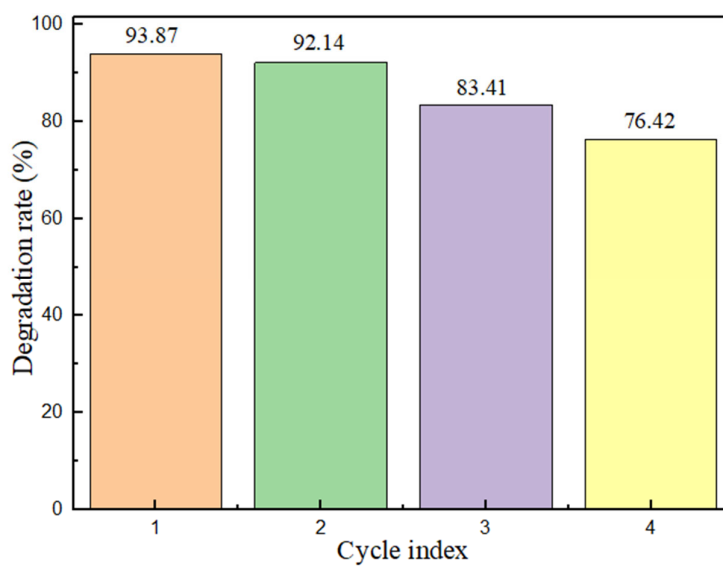

Figure. S2. Recycling efficiency of ZIF-8@TiO<sub>2</sub> (5%KI).
